# Supplementary figures and images for: Down-regulation of Myeloid Cell Leukemia-1 through Inhibiting Erk/Pin 1 Pathway by Sorafenib Facilitates Chemosensitization in Breast Cancer
Source: Oxford University Press journal article supplement (doi:10.1158/0008-5472.can-08-0579), 2008-08-01

## Supplemental Figure 1

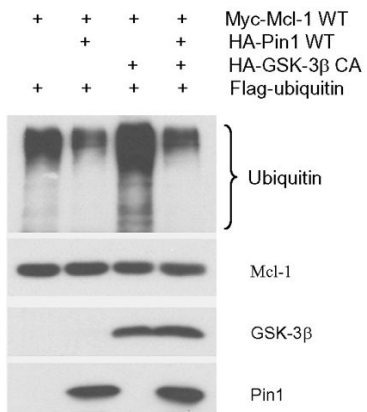

Supplement: 00085472can080579-sup-sf1.pdf [file 00085472can080579-sup-sf1.pdf]

## Supplemental Figure 2

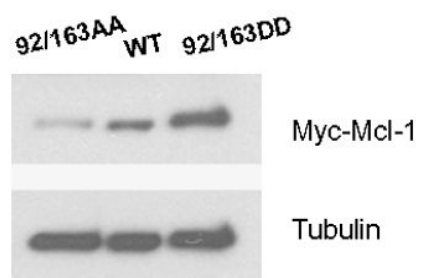

Supplement: 00085472can080579-sup-sf_2.pdf [file 00085472can080579-sup-sf_2.pdf]

# Supplemental Figure 3

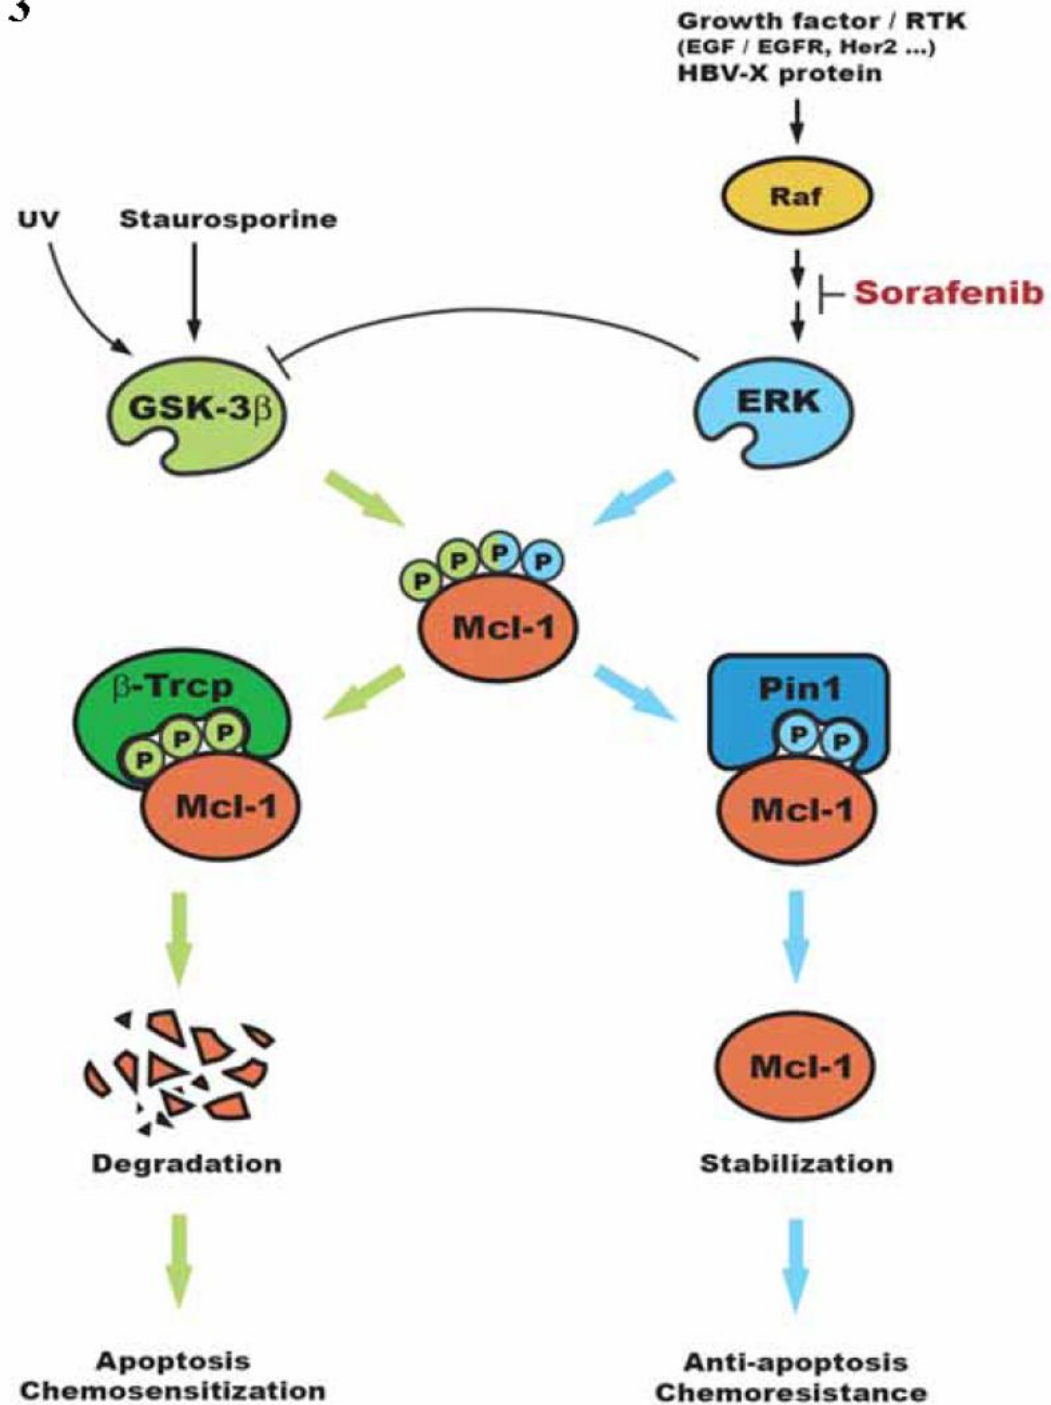

Supplement: 00085472can080579-sup-sf_3.pdf [file 00085472can080579-sup-sf_3.pdf]
